# Supplementary material
Source: PubMed Central journal article supplement (PMC6685754)
Supplement: NIHMS1028956-supplement-Supplemental_Materials.pdf [file NIHMS1028956-supplement-Supplemental_Materials.pdf]

**Supplemental Table 1.** Association between race and enrollment by region or poverty  
Of note, some of the subgroups in these post-hoc analyses contain small numbers of patients and should thus be interpreted with caution.

|                                        | N   | Rate of Enrollment (%) | Crude Risk Difference (%) | Adjusted* Risk Ratio |
|----------------------------------------|-----|------------------------|---------------------------|----------------------|
| <b>Stratified by Region</b>            |     |                        |                           |                      |
| Northeast                              | 50  |                        |                           |                      |
| White, non Hispanic                    | 33  | 73                     | ref                       | ref                  |
| Black, non Hispanic                    | 10  | 40                     | -33                       | 0.46 (0.36, 0.58)    |
| Hispanic                               | 2   | 100                    | 27                        | 1.34 (1.06, 1.68)    |
| Other                                  | 5   | 20                     | -53                       | 0.17 (0.07, 0.43)    |
| Midwest                                | 98  |                        |                           |                      |
| White, non Hispanic                    | 70  | 57                     | ref                       | ref                  |
| Black, non Hispanic                    | 12  | 17                     | -40                       | 0.50 (0.29, 0.88)    |
| Hispanic                               | 6   | 50                     | -7                        | 0.94 (0.89, 1.53)    |
| Other                                  | 10  | 50                     | -7                        | 0.97 (0.63, 1.50)    |
| South                                  | 124 |                        |                           |                      |
| White, non Hispanic                    | 54  | 57                     | ref                       | ref                  |
| Black, non Hispanic                    | 23  | 30                     | -27                       | 0.44 (0.23, 0.84)    |
| Hispanic                               | 27  | 52                     | -5                        | 0.94 (0.66, 1.36)    |
| Other                                  | 20  | 50                     | -7                        | 0.66 (0.36, 1.22)    |
| West                                   | 98  |                        |                           |                      |
| White, non Hispanic                    | 41  | 63                     | ref                       | ref                  |
| Black, non Hispanic                    | 3   | 67                     | 4                         | 1.02 (0.32, 3.28)    |
| Hispanic                               | 37  | 65                     | 2                         | 1.01 (0.63, 1.60)    |
| Other                                  | 17  | 65                     | 2                         | 1.06 (0.84, 1.33)    |
| <b>Stratified by Zip-based Poverty</b> |     |                        |                           |                      |
| >4% poverty                            | 281 |                        |                           |                      |
| White, non Hispanic                    | 137 | 65                     | ref                       | ref                  |
| Black                                  | 43  | 30                     | -35                       | 0.49 (0.34, 0.70)    |
| Hispanic                               | 62  | 65                     | 0                         | 0.94 (0.77, 1.15)    |
| Other                                  | 39  | 59                     | -6                        | 0.87 (0.66, 1.14)    |
| <4% poverty                            | 81  |                        |                           |                      |
| White, non Hispanic                    | 58  | 52                     | ref                       | ref                  |
| Black                                  | 4   | 50                     | -2                        | 1.16 (0.81, 1.66)    |
| Hispanic                               | 8   | 25                     | -27                       | 0.41 (0.11, 1.51)    |
| Other                                  | 11  | 27                     | -25                       | 0.42 (0.17, 1.08)    |

\*Adjusted for race, age, year, SES, and acuity

**Supplemental Figure 1.** Institution-level variation in the rates of trial enrollment on AAML1031 (left) and 9-month inpatient mortality (right) Institutions are numbered in order of decreasing rates of trial enrollment. Enrollment and mortality do not appear to be correlated on the institution-level.

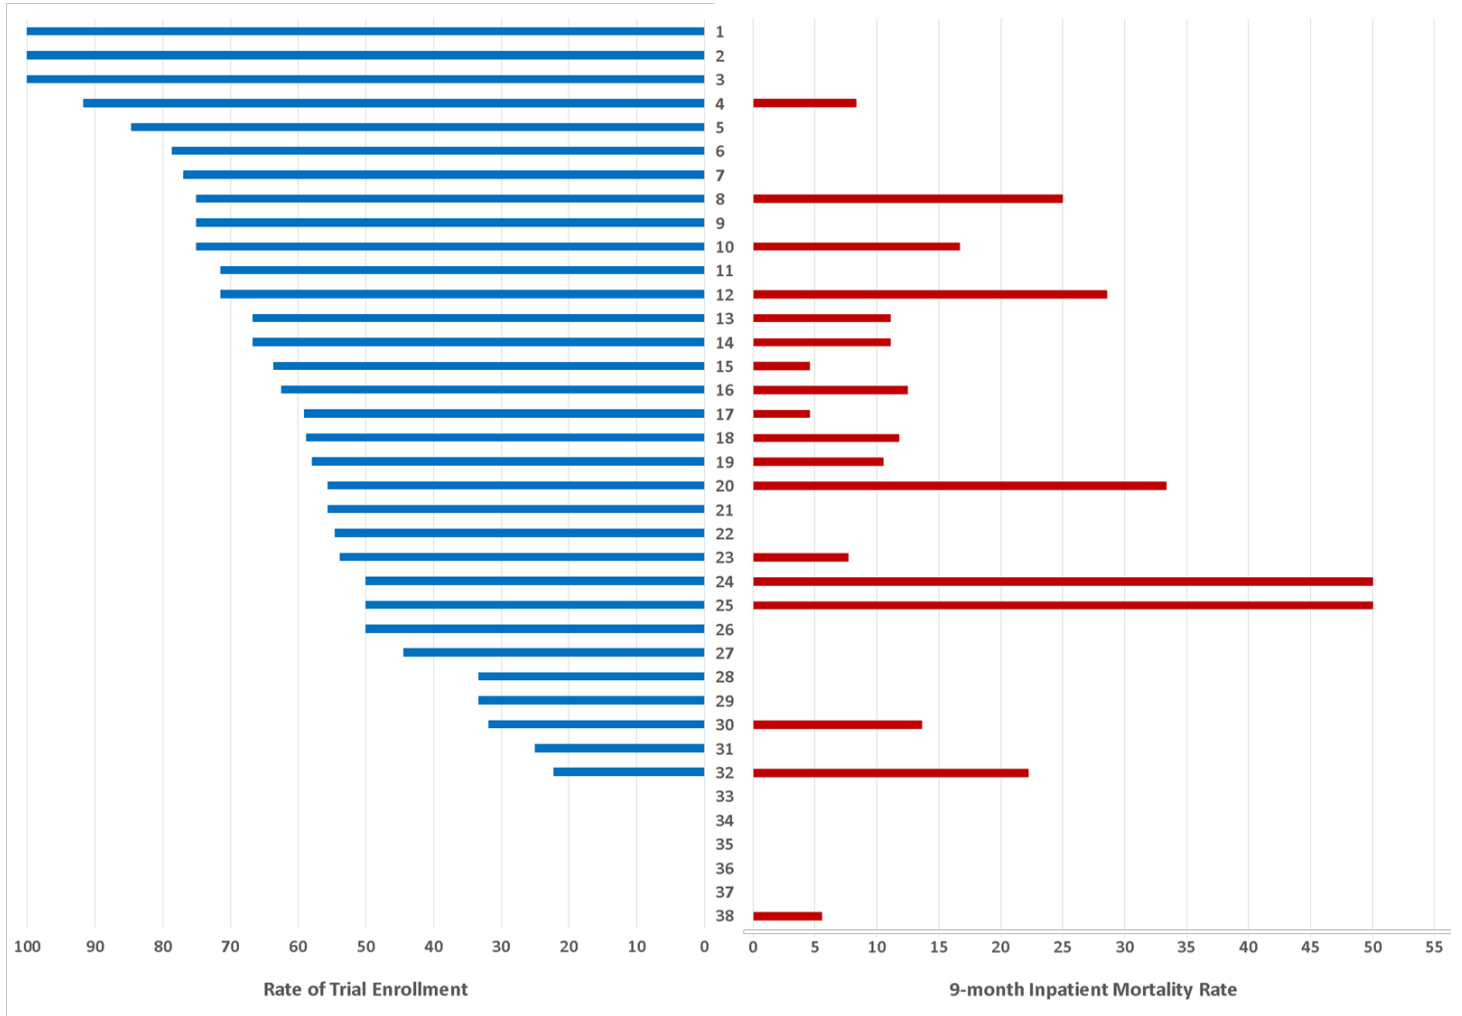

**Supplemental Table 2.** Institution-level characteristics as predictors of enrollment  
None of the institutional characteristics were associated with trial enrollment.

| Characteristics                                   | Unadjusted RR<br>(95% CI) | p    |
|---------------------------------------------------|---------------------------|------|
| AML patient volume (by 50 patients)               | 1.17 (0.28, 4.94)         | 0.83 |
| % Black*                                          | 0.94 (0.85, 1.04)         | 0.23 |
| % public insurance*                               | 1.04 (0.97, 1.10)         | 0.27 |
| % urban*                                          | 1.01 (0.92, 1.10)         | 0.88 |
| % hospital-wide inpatient mortality (1% increase) | 0.76 (0.47, 1.24)         | 0.27 |
| Median Household income (by 10k)                  | 1.05 (0.91, 1.21)         | 0.53 |

\* 10% increase

**Supplemental Table 3.** Characteristics of matched versus unmatched patients

Those who were unable to be matched did not differ significantly from those that were able to be matched.

|                                             | AAML1031 COG-PHIS<br>merged patients<br>matched to PHIS AML<br>cohort<br>N=206 (%) | AAML1031 COG-<br>PHIS merged<br>patients unmatched<br>to PHIS AML cohort<br>N=39 (%) | p-value |
|---------------------------------------------|------------------------------------------------------------------------------------|--------------------------------------------------------------------------------------|---------|
| <b>Race/Ethnicity</b>                       |                                                                                    |                                                                                      | 0.84    |
| White Non-Hispanic                          | 119 (58)                                                                           | 24 (62)                                                                              |         |
| Black Non-Hispanic                          | 21 (10)                                                                            | 5 (13)                                                                               |         |
| Hispanic                                    | 42 (20)                                                                            | 7 (18)                                                                               |         |
| Other                                       | 24 (12)                                                                            | 3 (8)                                                                                |         |
| <b>Sex</b>                                  |                                                                                    |                                                                                      | 0.87    |
| Female                                      | 98 (48)                                                                            | 18 (46)                                                                              |         |
| Male                                        | 108 (52)                                                                           | 21 (54)                                                                              |         |
| <b>Age, years</b>                           |                                                                                    |                                                                                      | 0.11    |
| 0-1                                         | 15 (7)                                                                             | 1 (3)                                                                                |         |
| 1-5                                         | 54 (26)                                                                            | 9 (23)                                                                               |         |
| 5-10                                        | 37 (18)                                                                            | 5 (13)                                                                               |         |
| 10-15                                       | 52 (25)                                                                            | 7 (18)                                                                               |         |
| >15                                         | 48 (23)                                                                            | 17 (44)                                                                              |         |
| <b>Insurance type</b>                       |                                                                                    |                                                                                      | 0.28    |
| Private                                     | 100 (49)                                                                           | 24 (62)                                                                              |         |
| Public                                      | 97 (47)                                                                            | 13 (33)                                                                              |         |
| Other                                       | 9 (4)                                                                              | 2 (5)                                                                                |         |
| <b>Illness severity at<br/>Presentation</b> |                                                                                    |                                                                                      | 0.25    |
| No ICU                                      | 187 (91)                                                                           | 38 (97)                                                                              |         |
| 1 system                                    | 14 (7)                                                                             | 0 (0)                                                                                |         |
| 2 or more systems                           | 5 (2)                                                                              | 1 (3)                                                                                |         |
| <b>Region</b>                               |                                                                                    |                                                                                      | 0.26    |
| South                                       | 62 (30)                                                                            | 10 (26)                                                                              |         |
| Midwest                                     | 50 (24)                                                                            | 15 (39)                                                                              |         |
| Northeast                                   | 31 (15)                                                                            | 3 (8)                                                                                |         |
| West                                        | 63 (31)                                                                            | 11 (28)                                                                              |         |
| <b>Year</b>                                 |                                                                                    |                                                                                      | 0.77    |
| 2011                                        | 21 (10)                                                                            | 2 (5)                                                                                |         |
| 2012                                        | 82 (40)                                                                            | 16 (41)                                                                              |         |
| 2013                                        | 68 (33)                                                                            | 13 (33)                                                                              |         |
| 2014                                        | 35 (17)                                                                            | 8 (21)                                                                               |         |
